# Supplementary material for: Immobilization of poly(lactide-co-glycolide) microspheres on bone implant materials for antibiotic release and the binding mechanisms
Source: Royal Society of Chemistry journal article supplement (doi:10.1039/c9ra08246h), 2020-01-01
Supplement: c9ra08246h1.pdf [file c9ra08246h1.pdf]

Supplementary information

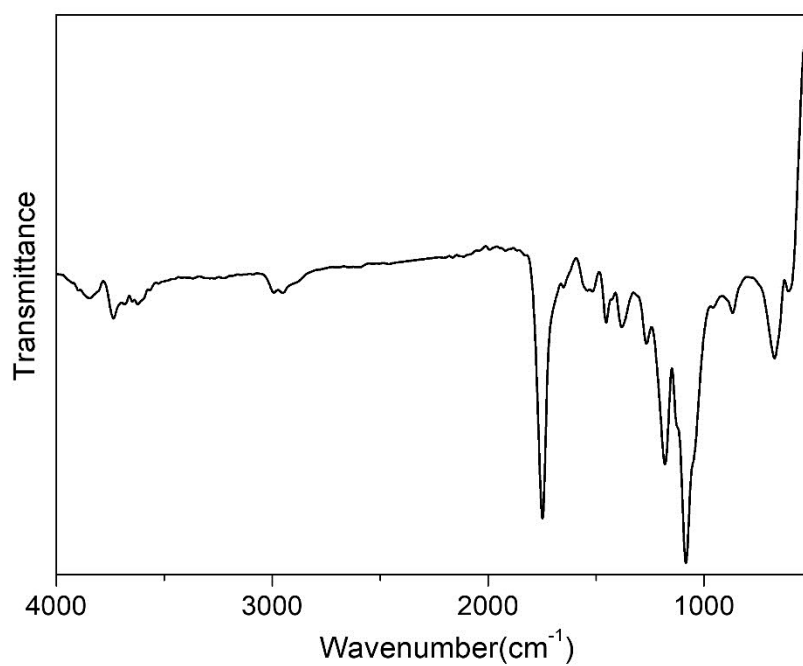

Supplementary Figure 1. FTIR spectrum of drug-free PLGA microspheres
